# Supplementary material
Source: ML conference proceedings conference paper supplement (https://proceedings.neurips.cc/paper_files/paper/2016/hash/795c7a7a5ec6b460ec00c5841019b9e9-Abstract.html)
Supplement: Supplementary file 1 [file 795c7a7a5ec6b460ec00c5841019b9e9-Supplemental.zip]

Archive with 1 entries (1 files):
- supplement.pdf
